# Supplementary material for: Assessing the knowledge and skills on emergency obstetric care among health providers: Implications for health systems strengthening in Nigeria
Source: PubMed Central journal article supplement (PMC6453439; doi:10.1371/journal.pone.0213719), 2019-04-08
Supplement: pone.0213719.s001.pdf [file pone.0213719.s001.pdf]

**RESEARCH TO IMPROVE THE QUALITY OF CARE FOR THE MANAGEMENT OF OBSTETRICS COMPLICATIONS THAT LEAD TO MATERNAL AND PERINATAL MORTALITY IN NIGERIA**

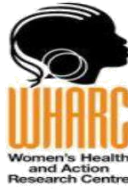

***Formative Research***

**FORM A8 – Knowledge and Practice of Emergency Obstetrics Care by Health Providers**

*To be filled by all health providers (Exclude medical, nursing and midwifery students in training) in Obstetrics & Gynaecology. Your name is not required. Please feel free to write only the truth. Your answers will contribute to a database of information collected to help improve the provision of maternal and newborn health care. All answers are confidential and will not be shared with supervisors or affect your job in any way.*

|            |                                   |
|------------|-----------------------------------|
| <b>001</b> | Form Number:  _ _ _ _ _ _ _ _     |
| <b>002</b> | Hospital Name: _____              |
| <b>003</b> | State: _____                      |
| <b>004</b> | Zone: _____                       |
| <b>005</b> | Date (DD/MM/YY):  _ _ _ _ _ _ _ _ |

**SECTION A:**

| No               | Questions                                                                                                                          | Response categories                                                                                                                                              |  |       | Code                         |
|------------------|------------------------------------------------------------------------------------------------------------------------------------|------------------------------------------------------------------------------------------------------------------------------------------------------------------|--|-------|------------------------------|
| 101              | Age                                                                                                                                | [ _____ ] years                                                                                                                                                  |  |       |                              |
| 102              | Sex                                                                                                                                | 1=Male<br>2= Female                                                                                                                                              |  |       | [ <input type="checkbox"/> ] |
| 103              | What type of health professional are you?<br>(Check only one)                                                                      | 1=Nurse/Midwife<br>2=Medical Officer: _____<br><i>Specify Rank</i><br>3=SHO/Registrar<br>4=Senior Registrar<br>5=Consultant<br>6=Others: _____<br><i>SPECIFY</i> |  |       | [ <input type="checkbox"/> ] |
| 104              | Number of years since qualification                                                                                                |                                                                                                                                                                  |  | years |                              |
| 105              | How many years have you worked in this hospital?                                                                                   |                                                                                                                                                                  |  | years |                              |
| <b>SECTION B</b> |                                                                                                                                    |                                                                                                                                                                  |  |       |                              |
| 106              | Please estimate the % of your professional time each week spent in the following activities ( <i>Total should add up to 100%</i> ) |                                                                                                                                                                  |  |       |                              |
| 106a             | Patient care                                                                                                                       |                                                                                                                                                                  |  |       |                              |
| 106b             | Clinical training                                                                                                                  |                                                                                                                                                                  |  |       |                              |
| 106c             | Teaching/educating/instructing                                                                                                     |                                                                                                                                                                  |  |       |                              |
| 106d             | Research                                                                                                                           |                                                                                                                                                                  |  |       |                              |
| 106e             | Other (specify)                                                                                                                    |                                                                                                                                                                  |  |       |                              |
| 107              | Does your institution use the partograph to monitor labour?                                                                        | 1=Yes<br>2=No<br>3=Don't know                                                                                                                                    |  |       | [ <input type="checkbox"/> ] |
| 108              | Is the WHO manual 'Managing Complications in Pregnancy and Childbirth' available in your institution?                              | 1=Yes<br>2=No<br>3=Don't know                                                                                                                                    |  |       | [ <input type="checkbox"/> ] |
| 109              | If yes, on average, how many times have you used the manual as reference?                                                          | 1=Daily<br>2=Once a week<br>3=Once a month<br>4=Rarely<br>5=Never                                                                                                |  |       | [ <input type="checkbox"/> ] |
| 110              | Do you currently belong to any committees or organizations related to safe motherhood?                                             | 1=Yes<br>2=No                                                                                                                                                    |  |       | [ <input type="checkbox"/> ] |
| 111              | If yes, what is (are) the names of the committees) or organization(s)                                                              | (1). _____<br>(2). _____                                                                                                                                         |  |       |                              |
| 112              | <b>SECTION C: As an individual:</b>                                                                                                |                                                                                                                                                                  |  |       |                              |
| 112a             | Approximately how many births do you attend each week?                                                                             |                                                                                                                                                                  |  |       |                              |
| 112b             | Approximately how many antenatal clients do you see each week?                                                                     |                                                                                                                                                                  |  |       |                              |
| 112c             | Approximately how many postpartum clients do you see each week?                                                                    |                                                                                                                                                                  |  |       |                              |

| No   | Questions                                                                                                                              | Response categories                                          |  |  | Code |
|------|----------------------------------------------------------------------------------------------------------------------------------------|--------------------------------------------------------------|--|--|------|
| 113  | How would you rate the level of maternal mortality in this hospital                                                                    | 1=High<br>2=Average<br>3=Low<br>4=Don't know                 |  |  | [ ]  |
| 114  | Have you personally attended to women who died during pregnancy?                                                                       | 1=Yes<br>2=No                                                |  |  | [ ]  |
| 115  | If yes, approximately how many women in the last one year?                                                                             |                                                              |  |  |      |
| 116  | What are the most common conditions that lead to maternal death in this hospital ( <i>please rank them from most to least common</i> ) | (1). _____<br>(2). _____<br>(3). _____<br>(4). _____         |  |  |      |
| 117  | How common is post-partum hemorrhage (PPH) in your practice?                                                                           | 1=Very common<br>2=Common<br>3=Uncommon/Rare<br>4=Don't know |  |  | [ ]  |
| 118  | How many clients with PPH have you managed in the last:                                                                                | one week                                                     |  |  |      |
|      |                                                                                                                                        | one month                                                    |  |  |      |
| 119a | What method do you use to prevent PPH? (please state method)                                                                           | -----<br>-----                                               |  |  |      |
| 119b | What drug do you most commonly give to women to prevent PPH?                                                                           | -----<br>-----                                               |  |  |      |
| 119c | What dose do you give?                                                                                                                 | -----<br>-----                                               |  |  |      |
| 120a | What drug do you use to treat PPH ? (please state method)                                                                              | -----<br>-----                                               |  |  |      |
| 120b | What drug most commonly do you give to treat PPH?                                                                                      | -----<br>-----                                               |  |  |      |
| 120c | What dose do you give?                                                                                                                 | -----<br>-----                                               |  |  |      |
| 121a | How common is eclampsia in your clinical practice?                                                                                     | 1=Very common<br>2=Common<br>3=Uncommon/Rare<br>4=Don't know |  |  | [ ]  |
| 121b | How many cases of eclampsia did you see in your practice in the last                                                                   | one week                                                     |  |  |      |
|      |                                                                                                                                        | one month                                                    |  |  |      |
|      |                                                                                                                                        | 9=Don't know                                                 |  |  | [ ]  |
| 122a | What drug do you use for the management of convulsion in a patient with eclampsia routinely? (please provide name of drug)             | -----<br>-----                                               |  |  |      |

| No   | Questions                                                                                    | Response categories                                          | Code |
|------|----------------------------------------------------------------------------------------------|--------------------------------------------------------------|------|
| 122b | What dose of the drug do you use?                                                            | -----<br>-----                                               |      |
| 122c | How common is obstructed labour in this hospital?                                            | 1=Very common<br>2=Common<br>3=Uncommon/Rare<br>4=Don't know | [ ]  |
| 123  | How many cases of obstructed labour/ruptured uterus did you see in your practice in the last | one week                                                     |      |
|      |                                                                                              | one month                                                    |      |
|      |                                                                                              | 9=Don't know                                                 |      |
|      |                                                                                              |                                                              | [ ]  |
| 124  | How do you prevent obstructed labour in your practice? ( <i>Name main method</i> )           | 1. -----<br><br>9=Don't know                                 | [ ]  |
| 125  | How do you manage obstructed labour in your practice ( <i>Name main method</i> )             | 1. -----<br><br>9=Don't know                                 | [ ]  |
| 126  | Do you do clinical/maternal audit in your hospital?                                          | 1=Yes<br>2=No                                                | [ ]  |
| 127  | If yes, how often?                                                                           | 1=Weekly<br>2=Monthly<br>3=Quarterly<br>4=Bi-annual          | [ ]  |

**SECTION D:**

**Survey of Clinical Skill sets**

*(Please complete the table below according to the following instructions)*

**Column A:** State the number of cases you have performed in the last one year

**Column B:** How confident are you in performing the skills? (Please, choose the right option)

1. Confident; I do not need any coaching
2. Not confident; I need more coaching
3. Not confident; I cannot perform this skill
4. N/A Not permitted to perform this skill according to country/hospital policy

**Column C:** Please check 1 for the skill you have taught to others and 2 if otherwise

| SKILL                                                              | Column A                                     | Column B                                                             | Column C                                |
|--------------------------------------------------------------------|----------------------------------------------|----------------------------------------------------------------------|-----------------------------------------|
|                                                                    | Number of Cases performed in the last 1 year | Confidence in performing procedure                                   | Whether skill has been taught to others |
|                                                                    | Please, write the number                     | 1=Very confident<br>2=Not very confident<br>3=Not confident<br>4=N/A | 1=Yes<br>2=No                           |
| Antenatal Care                                                     | <input type="text"/>                         | <input type="text"/>                                                 | <input type="text"/>                    |
| Counseling women on birth preparedness and complications readiness | <input type="text"/>                         | <input type="text"/>                                                 | <input type="text"/>                    |
| Monitoring Labor using partograph                                  | <input type="text"/>                         | <input type="text"/>                                                 | <input type="text"/>                    |
| Active management of third stage of labor                          | <input type="text"/>                         | <input type="text"/>                                                 | <input type="text"/>                    |
| Postpartum care                                                    | <input type="text"/>                         | <input type="text"/>                                                 | <input type="text"/>                    |
| Neonatal resuscitation                                             | <input type="text"/>                         | <input type="text"/>                                                 | <input type="text"/>                    |
| Caesarean section                                                  | <input type="text"/>                         | <input type="text"/>                                                 | <input type="text"/>                    |
| Vacuum delivery                                                    | <input type="text"/>                         | <input type="text"/>                                                 | <input type="text"/>                    |
| Forceps delivery                                                   | <input type="text"/>                         | <input type="text"/>                                                 | <input type="text"/>                    |
| Laparotomy and repair of ruptured uterus/Hysterectomy              | <input type="text"/>                         | <input type="text"/>                                                 | <input type="text"/>                    |
| Use of magnesium sulphate                                          | <input type="text"/>                         | <input type="text"/>                                                 | <input type="text"/>                    |
|                                                                    | <input type="text"/>                         | <input type="text"/>                                                 | <input type="text"/>                    |
| Bimanual compression of the uterus                                 | <input type="text"/>                         | <input type="text"/>                                                 | <input type="text"/>                    |
| Repair of cervical tears                                           | <input type="text"/>                         | <input type="text"/>                                                 | <input type="text"/>                    |
| Repair of episiotomy                                               | <input type="text"/>                         | <input type="text"/>                                                 | <input type="text"/>                    |
| Repair of first and second degree perineal tears                   | <input type="text"/>                         | <input type="text"/>                                                 | <input type="text"/>                    |
| Management of PPH                                                  | <input type="text"/>                         | <input type="text"/>                                                 | <input type="text"/>                    |
| Management of eclampsia                                            | <input type="text"/>                         | <input type="text"/>                                                 | <input type="text"/>                    |

*Thank you.*
